# Supplementary material
Source: PubMed Central journal article supplement (PMC4054224)
Supplement: AEM.00430-14_zam999105439so1.pdf [file AEM.00430-14_zam999105439so1.pdf]

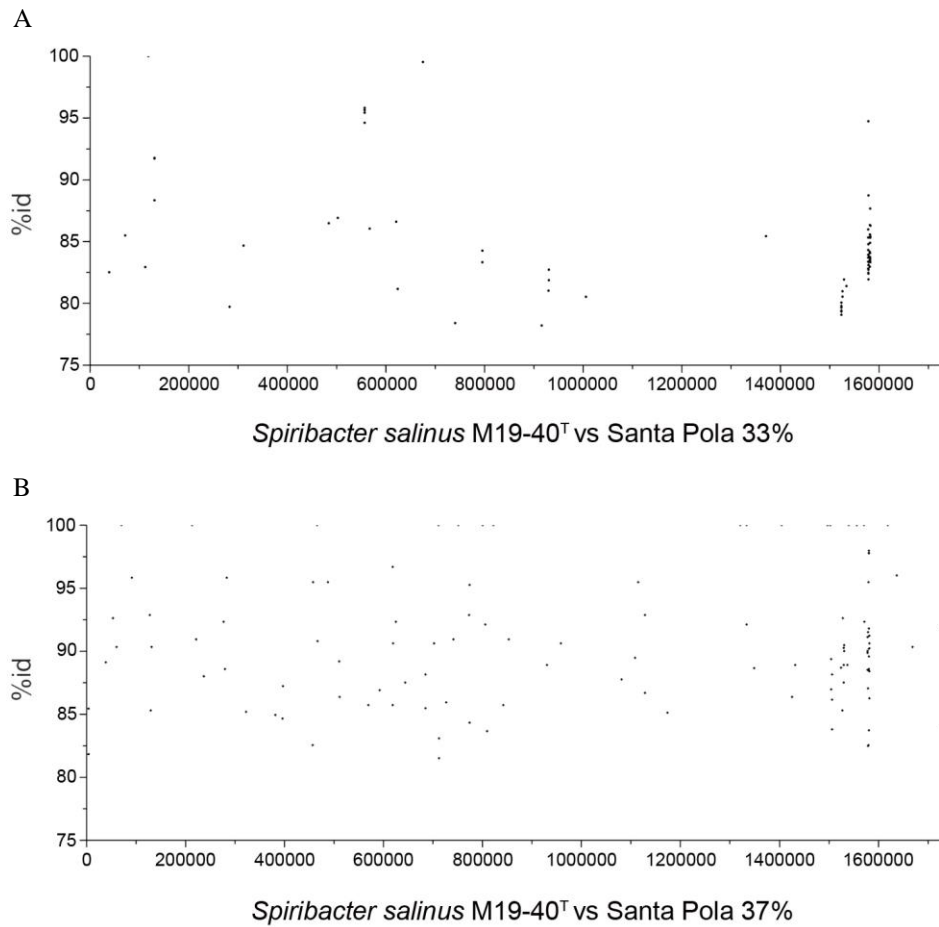

**Supplementary Figure S1.** Recruitment of *Spiribacter salinus* M19-40<sup>T</sup> genome (1739487 bp) against metagenomes of two different ponds of different salinities from Santa Pola saltern. **A**, metagenome from 33 % salinity pond; **B**, metagenome from 37 % salinity pond. A restrictive cut-off of 95% of identity and at least 50 bp alignment length was used.

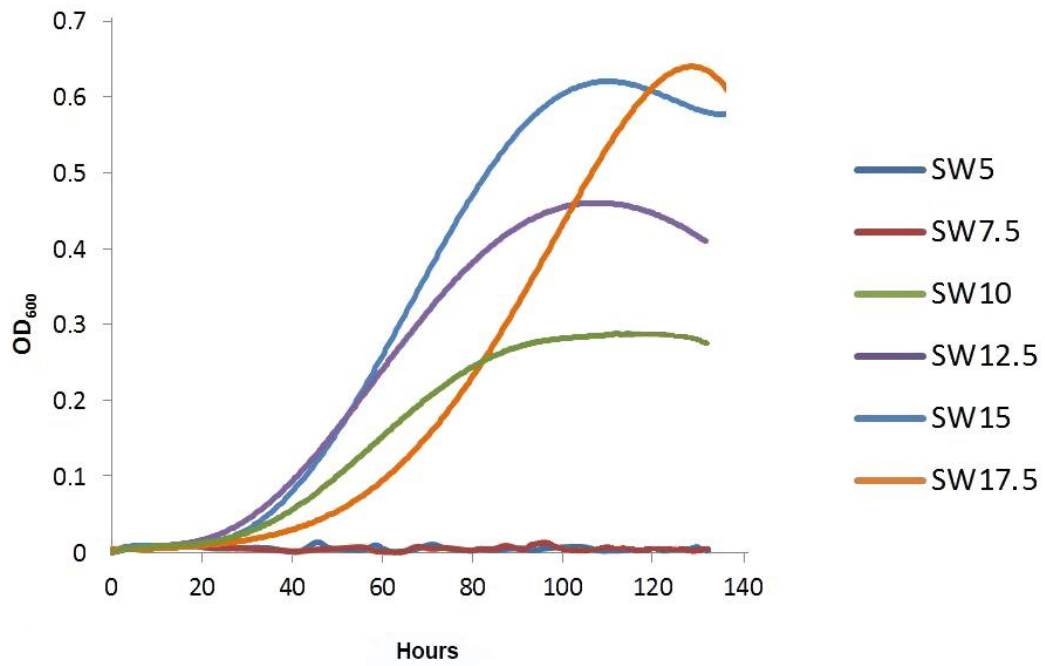

**Supplementary Figure S2.** Growth curves of *Spiribacter salinus* M19-40<sup>T</sup> on SM liquid medium at different salt concentrations (from 5 to 17.5 % salts).

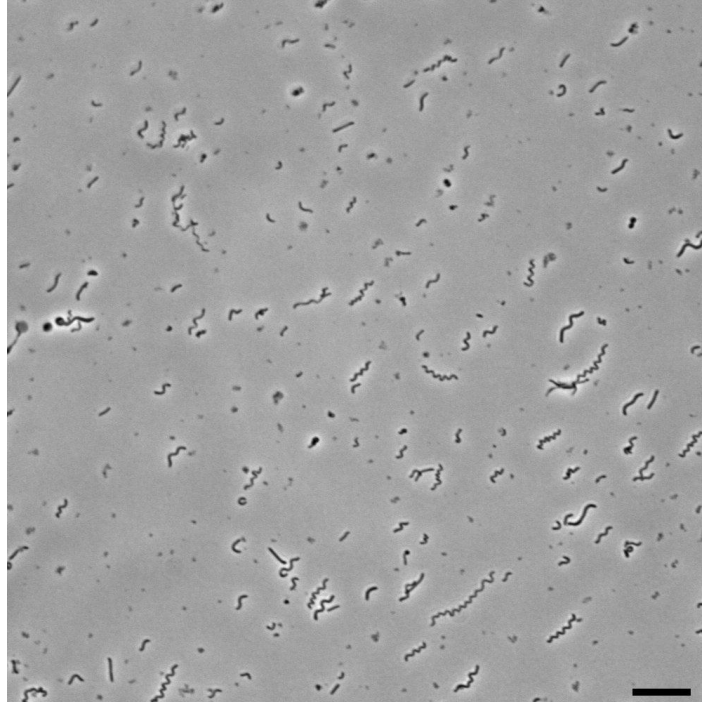

**Supplementary Figure S3.** Phase-contrast micrograph of cells of *Spiribacter salinus* M19-40<sup>T</sup> grown on SM15 liquid medium. Bar, 10  $\mu\text{m}$ .

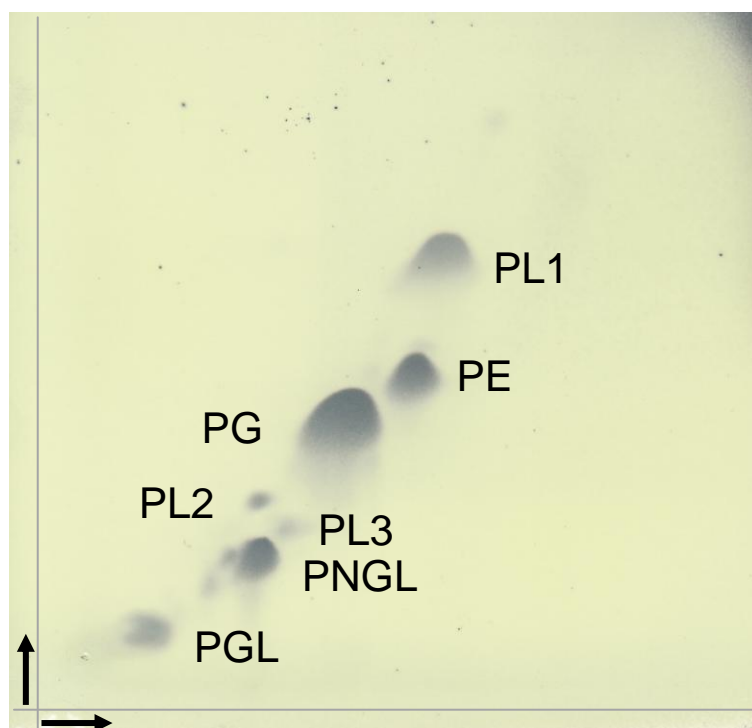

**Supplementary Figure S4.** Polar lipids composition of *Spiribacter salinus* M19-40<sup>T</sup>. PL1-3, Phospholipids; PG, Phosphatidylglycerol; PE, Phosphatidylethanolamine; PNGL, Phosphoaminoglycolipid; PGL, Phosphoglycolipid (atypical sugar). Direction of development: first dimension, horizontal; second dimension, vertical. The origin is in the bottom left-hand corner.
